# Supplementary material for: Corrosion of Copper in a Tropical Marine Atmosphere Rich in H2S Resulting from the Decomposition of Sargassum Algae
Source: MDPI journal article supplement (doi:10.3390/met13050982), 2023-05-19
Supplement: s1 [file s1]

Archive with 1 entries (1 files):
- metals-2368588-supplementary.pdf
