# Supplementary material for: Corrosion of Copper in a Tropical Marine Atmosphere Rich in H2S Resulting from the Decomposition of Sargassum Algae
Source: MDPI journal article supplement (doi:10.3390/met13050982), 2023-05-19
Supplement: s1 [file s1 › metals-2368588-supplementary.pdf]

**Table S1.** Monthly average of Humidity Rate (%) during the experiment.

| M 1  | M 2  | M 3  | M 4  | M 5  | M 6  | M 7  | M 8  | M 9  | M 10 | M 11 | M 12 |
|------|------|------|------|------|------|------|------|------|------|------|------|
| 75.0 | 76.1 | 75.6 | 75.4 | 72.1 | 74.7 | 73.4 | 71.9 | 71.8 | 71.5 | 70.3 | 74.6 |

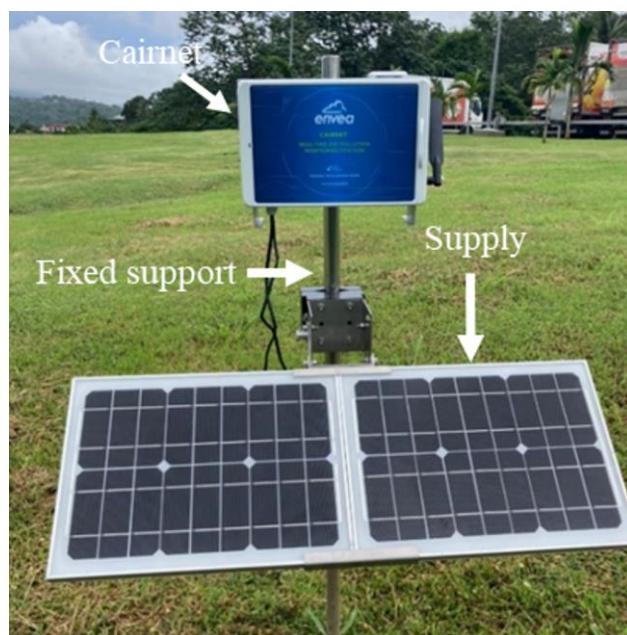

**Figure S1.** Photograph of Cairpol sensor system.

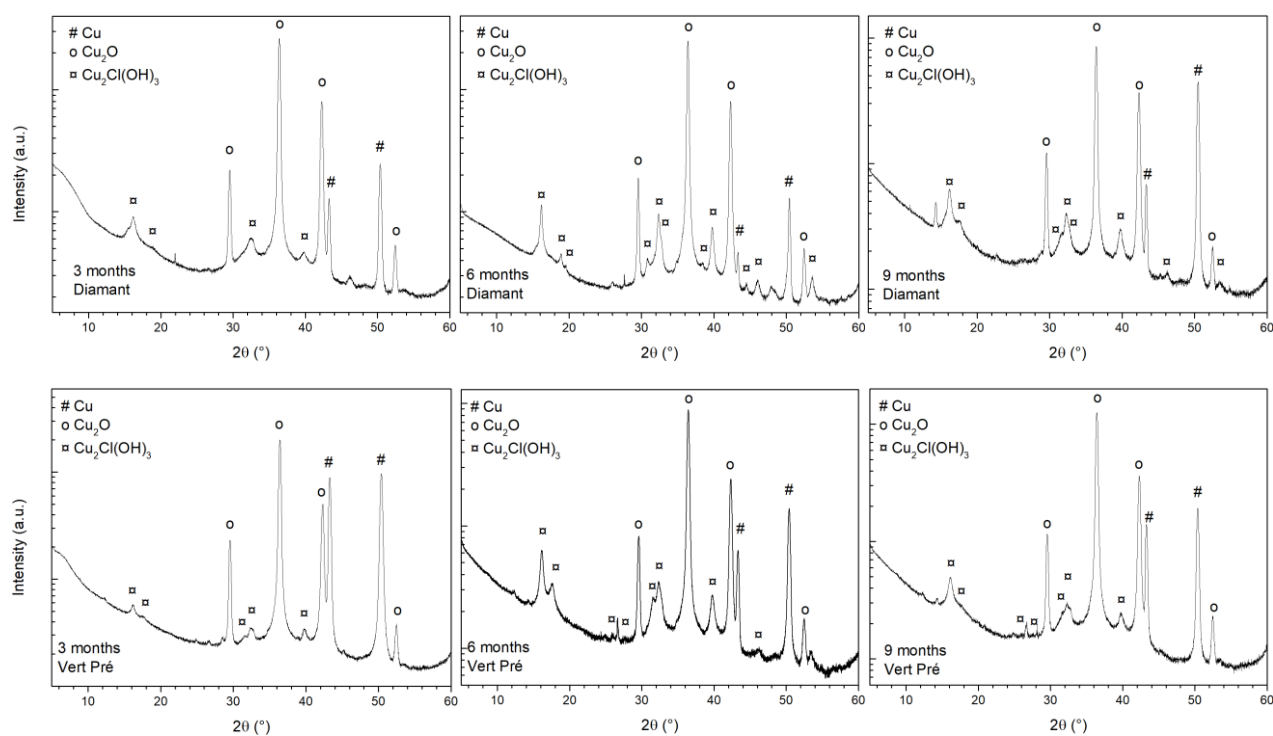

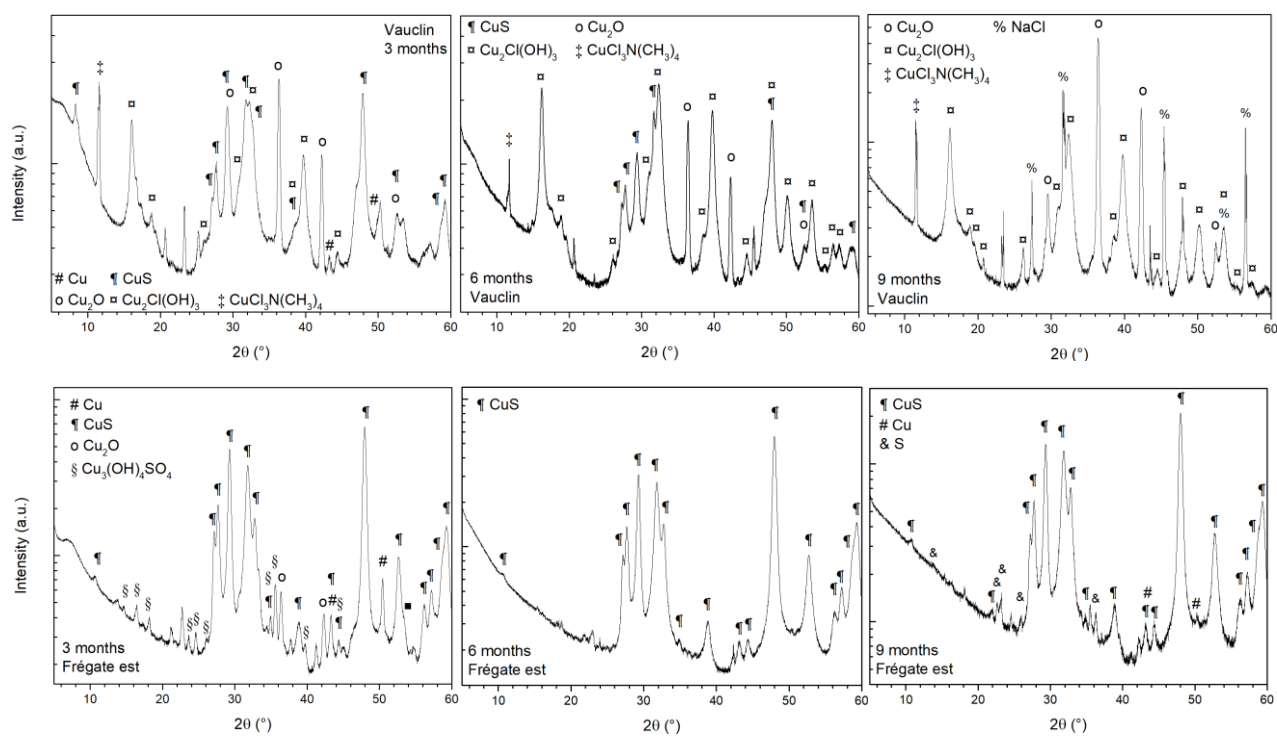

**Figure S2.** XRD patterns obtained for samples exposed in Diamant, Vert pré, Vauclin and Frégate est from 3 to 9 months.
